# Supplementary material for: Senescent hepatic stellate cells promote liver regeneration through IL-6 and ligands of CXCR2
Source: PubMed Central journal article supplement (PMC9431681; doi:10.1172/jci.insight.158207), 2022-06-16
Supplement: jciinsight-7-158207-s008.pdf [file jciinsight-7-158207-s008.pdf]

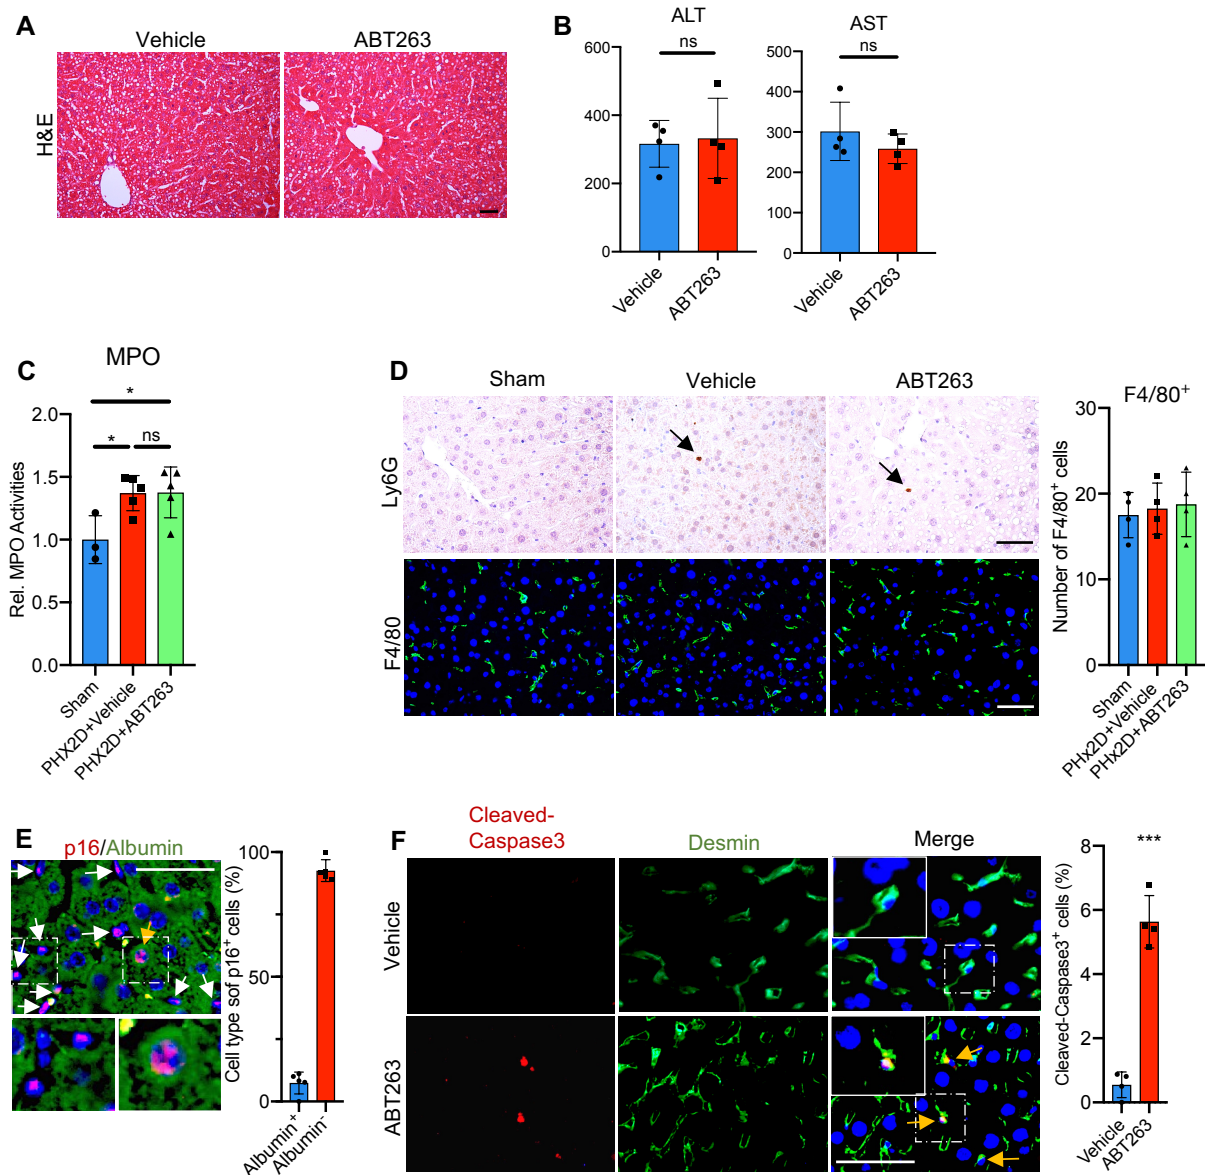

**Supplemental Figure 1. Vehicle- and ABT263-treated mice sustained similar liver damage after PHx.** (A) H&E staining of liver tissue sections from vehicle- or ABT263-treated WT mice 2 days post-PHx. (B) Serum levels of ALT and AST were analyzed ( $n=4$ ). (C) MPO activity in mice was measured 2 days post PHx ( $n=3$  for sham control,  $n=5$  for vehicle- and ABT263-treated mice). (D) Liver sections of sham-operated mice or mice subjected to PHx with or without ABT263 exposure were stained with anti-Ly6G or anti-F4/80 antibodies 2 days after surgery. Arrows point to Ly6G<sup>+</sup> cells. The number of F4/80<sup>+</sup> cells per microscopic field was quantified by cell counting ( $n=4$ ). (E) Liver sections from WT mice 2 days after PHx were immunostained for p16 (red) and Albumin (green) and counterstained with DAPI (blue). The percentages of p16<sup>+</sup> cells that were Albumin<sup>+</sup> (yellow arrow and lower right panel) or Albumin<sup>-</sup> (white arrows and lower left panel) were quantified by cell counting ( $n=5$ ). (F) Liver sections of vehicle- and ABT263-treated WT mice 2 days post-PHx were stained with anti-cleaved caspase3 (red) and anti-Desmin (green) antibodies and counterstained with DAPI (blue). Yellow arrows point to cleaved-Caspases3<sup>+</sup> cells. The percentage of Caspase 3<sup>+</sup> cells were quantified by cell counting ( $n=4$ ). Scale bar: 50  $\mu$ m. Data expressed as mean  $\pm$  SD. \* $P<0.033$ , \*\* $P<0.002$ , \*\*\* $P<0.001$ , Student's  $t$ -test.

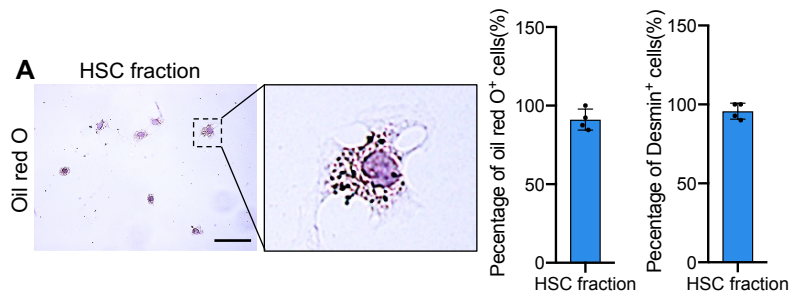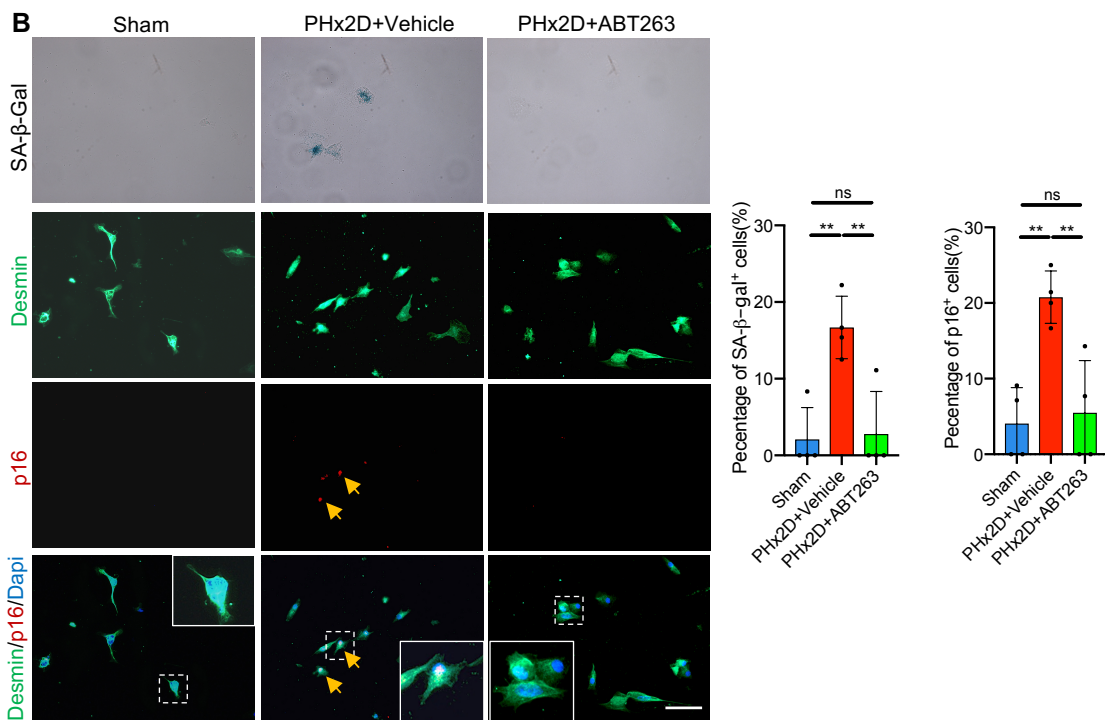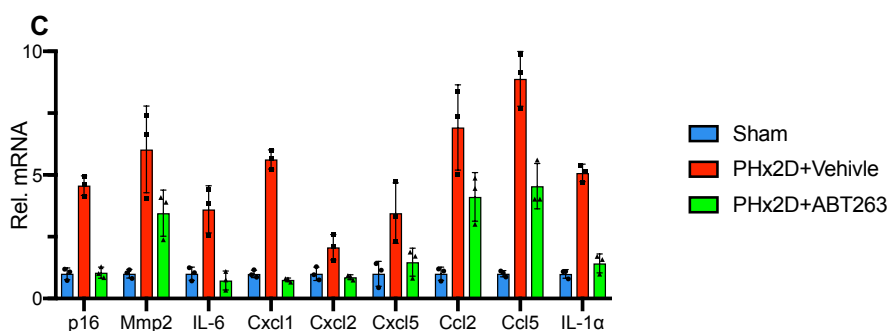

**Supplemental Figure 2. PHx induces HSC senescence.** (A) After liver perfusion and gradient centrifugation, primary cells from the HSC fraction were stained with oil red O and counterstained with Hematoxylin. The percentage of oil red O<sup>+</sup> cells and Desmin<sup>+</sup> cells were quantified by cell counting ( $n=4$ ). (B) Primary HSCs isolated from indicated livers 2 days after PHx were stained for SA-β-Gal activity (blue) or were double immunostained for p16 (red) and Desmin (green) and counterstained with DAPI (blue). Yellow arrows point to p16<sup>+</sup> cells. The number of SA-β-Gal<sup>+</sup> cells and p16<sup>+</sup> were quantified by cell counting ( $n=4$ ). (C) Expression of *p16* and genes of the SASP in the primary HSCs isolated from the indicated livers was quantified by qPCR ( $n=3$ ). Scale bar: 50 μm. Data expressed as mean  $\pm$  SD. \* $P<0.033$ , \*\* $P<0.002$ , \*\*\* $P<0.001$ , Student's *t*-test.



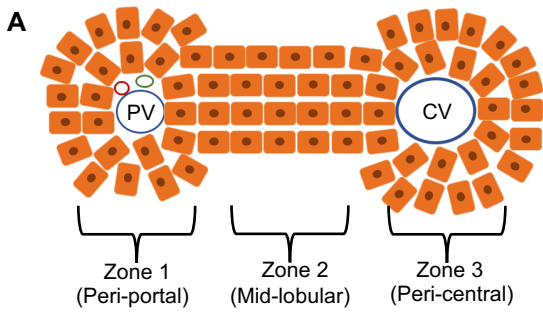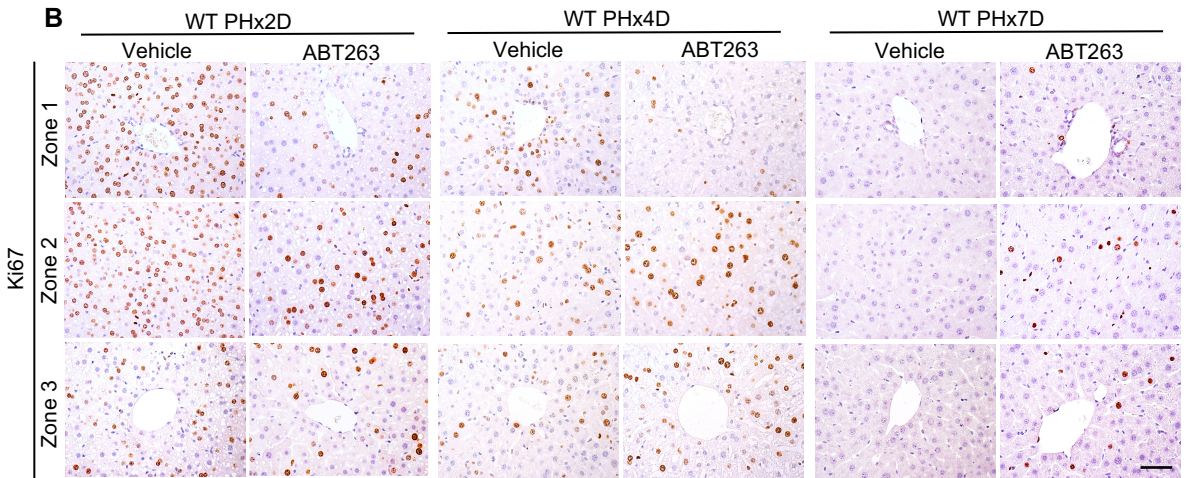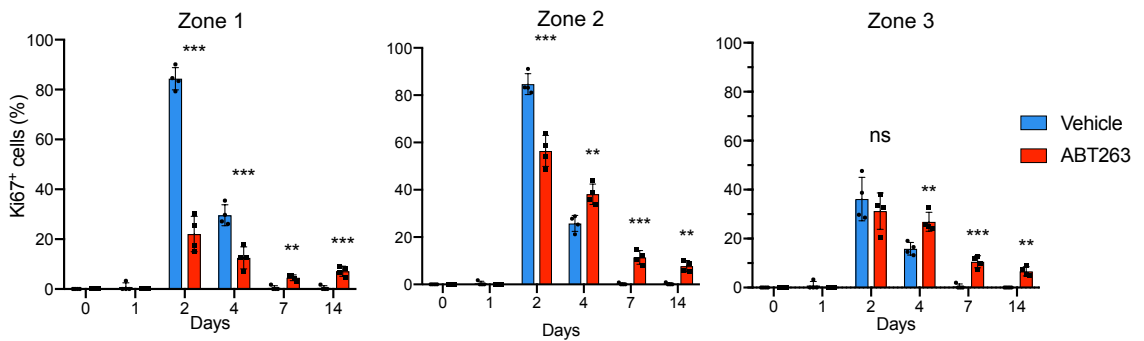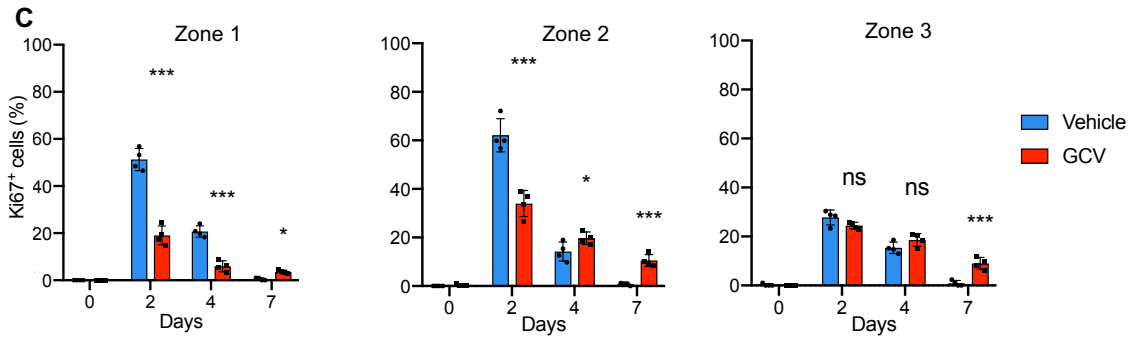

**Supplemental Figure 3. Reduced hepatocyte proliferation in livers of mice with senescent cell elimination.** (A) Schematic diagram of the hepatic zones: zone 1 (peri-portal region), zone 2 (mid-lobular region), and zone 3 (peri-central region) are indicated. (B) Livers from WT mice treated with vehicle or ABT263 were harvested at 0, 1, 2, 4, 7, and 14 days after-PHx and were sectioned and stained with anti-Ki67 antibodies. Staining of liver sections from days 2 (PHx2D), 4 (PHx4D), and 7 (PHx7D) in zones 1, 2, and 3 are shown. The number of Ki67<sup>+</sup> hepatocytes was quantified by cell counting ( $n=4$ ). (C) Livers from p16-3MR mice treated with vehicle or GCV were harvested at 0, 2, 4, and 7 days post-PHx and were sectioned and stained with anti-Ki67 antibodies. The number of Ki67<sup>+</sup> hepatocytes was quantified by cell counting ( $n=4$ ). Scale bar: 50  $\mu\text{m}$ . Data expressed as mean  $\pm$  SD. \* $P<0.033$ , \*\* $P<0.002$ , \*\*\* $P<0.001$ , Student's  $t$ -test.

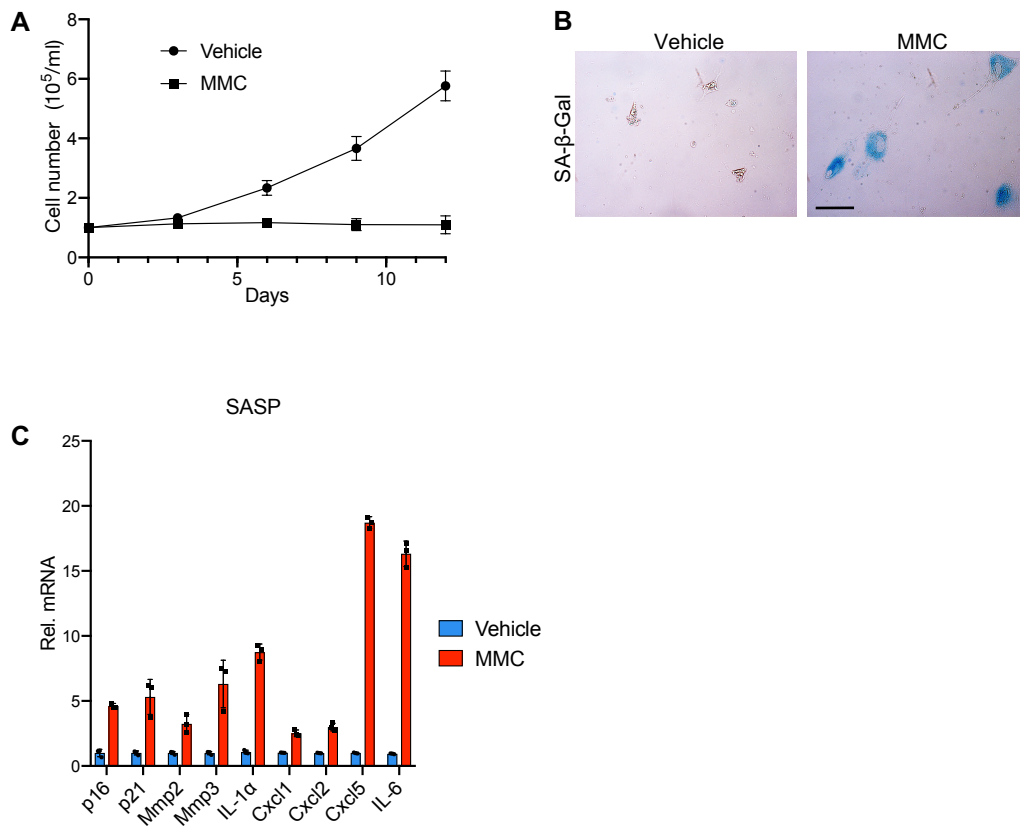

**Supplemental Figure 4. Characterization of MMC-induced senescent HSCs.**

(A) Proliferation of vehicle- and MMC- treated primary HSCs was assessed by cell counting ( $n=3$ ). (B) Primary HSCs treated with vehicle or MMC to induce senescence were stained for SA- $\beta$ -Gal activity. (C) Expression of senescence-related genes and genes of the SASP in HSCs was measured by qPCR analysis ( $n=3$ ). Scale bar: 50  $\mu$ m. Data expressed as mean  $\pm$  SD. \* $P<0.033$ , \*\* $P<0.002$ , \*\*\* $P<0.001$ , Student's  $t$ -test.

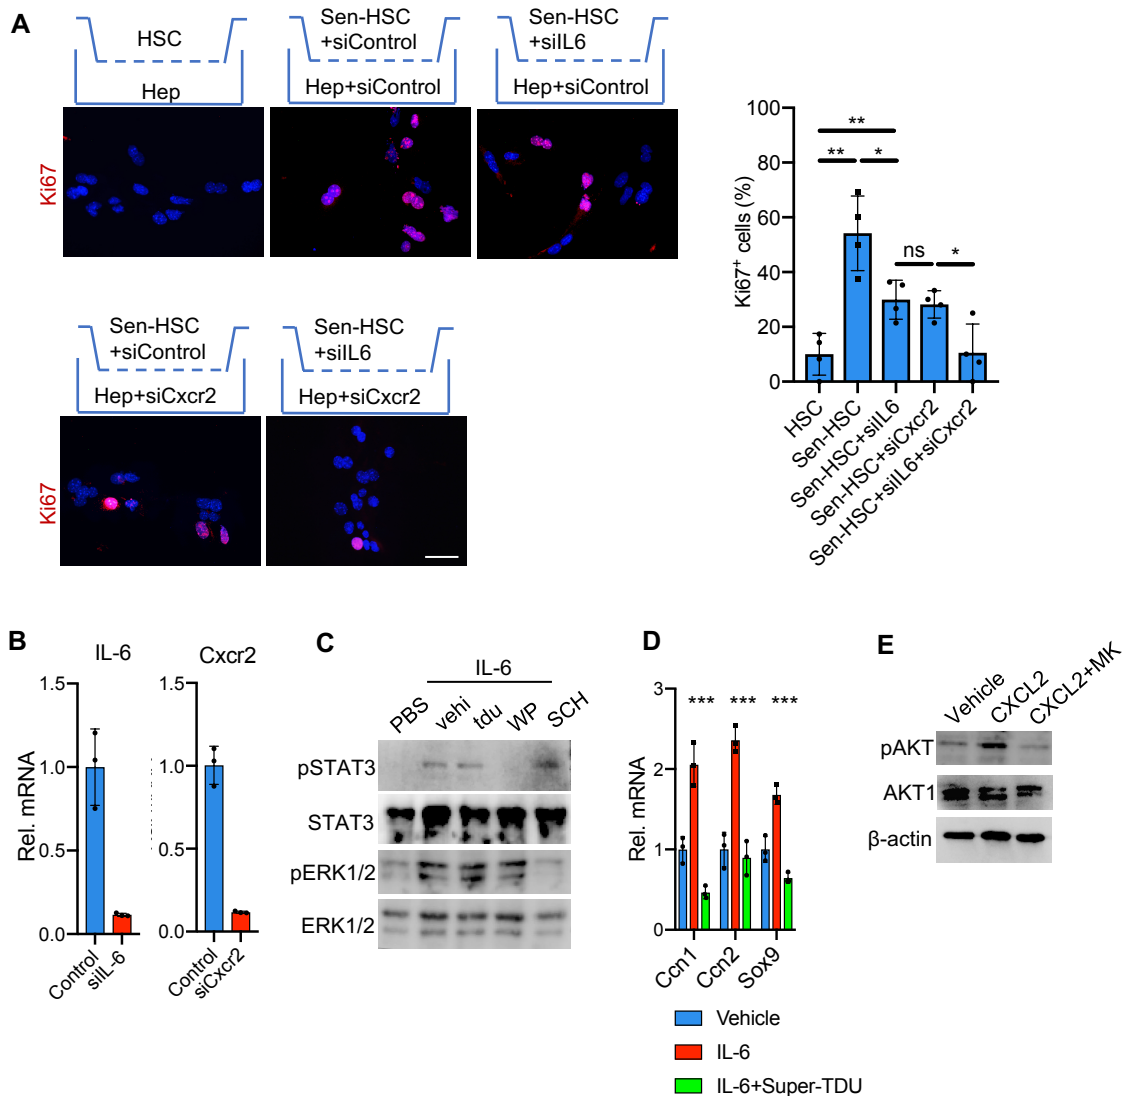

### Supplemental Figure 5. IL-6 and CXCR2 ligands of senescent HSCs induce hepatocyte proliferation.

(A) Primary hepatocytes isolated from 2-month-old WT male livers were treated with siControl or siCXCR2 then co-cultured with HSCs, senescent HSCs (Sen-HSC), and Sen-HSC which were treated with siControl or siIL-6 as indicated. After 24 hrs, primary hepatocytes were stained with anti-Ki67 (red). The number of Ki67<sup>+</sup> cells was quantified by cell counting ( $n=4$ ). (B) The expression of *IL-6* in Sen-HSCs and *Cxcr2* in hepatocytes was quantified by qPCR ( $n=3$ ). (C) Hepatocytes were treated with vehicle, IL-6, Super-TDU (TDU; 50 nM), WP1066 (WP; 5  $\mu$ M) and SCH772984 (SCH; 1  $\mu$ M) as indicated for 24 hrs were probed with indicated antibodies by immunoblotting. (D) The expression of YAP target genes in indicated hepatocytes was quantified by qPCR ( $n=3$ ). (E) Hepatocytes were treated with vehicle, CXCL2, MK2206 (MK; 1  $\mu$ M) as indicated for 24 hrs and were probed with indicated antibodies by immunoblotting. Scale bar: 50  $\mu$ m. Data expressed as mean  $\pm$  SD. \* $P < 0.033$ , \*\* $P < 0.002$ , \*\*\* $P < 0.001$ , Student's *t*-test.



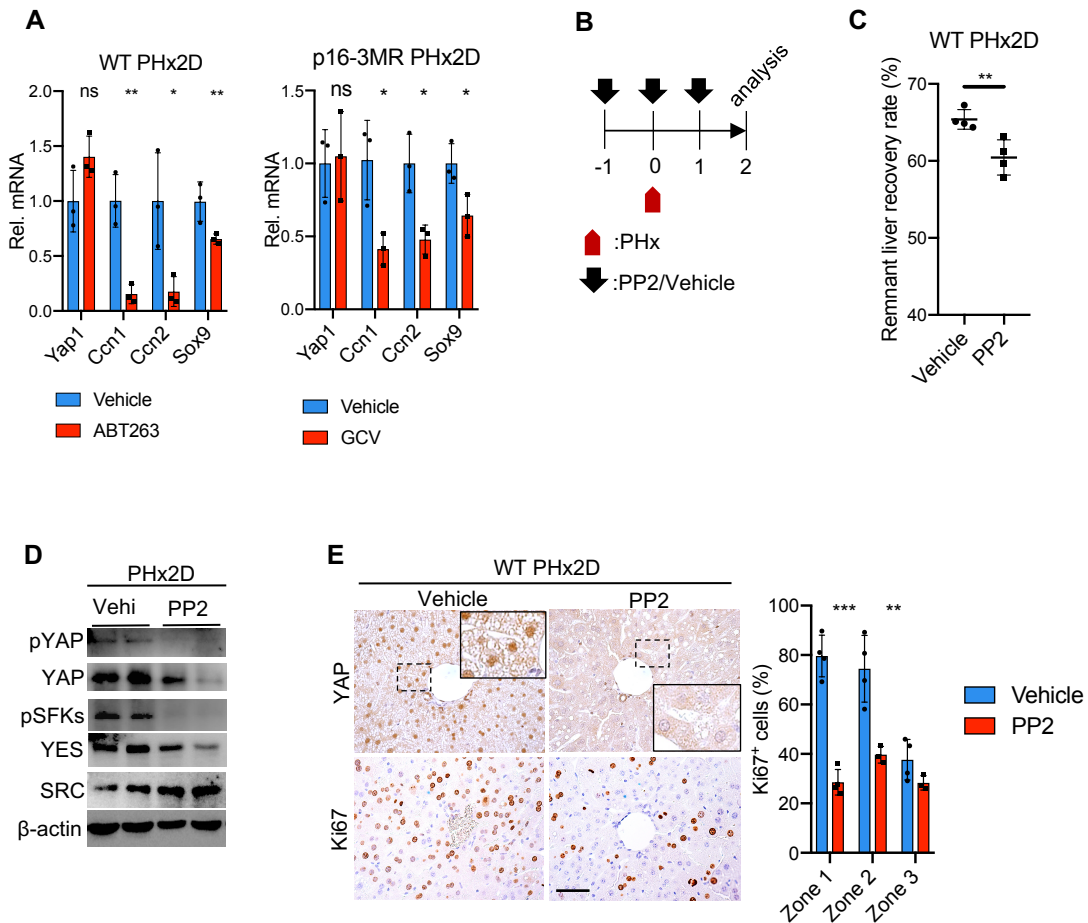

**Supplemental Figure 6. Inhibition of SFKs impairs YAP activation and liver regeneration.**

(A) In livers of WT or p16-3MR mice 2 days post-PHx with and without injection of ABT263 or GCV, respectively, the expression of *Yap1* and YAP target genes (*Ccn1*, *Ccn2*, *Sox9*) was quantified by qPCR ( $n=3$ ). (B) Experimental scheme of WT male mice subjected to PHx with or without injections of PP2 (5 mg/Kg). (C) The remnant liver recovery rates in vehicle- or PP2-treated WT mice were assessed two days post PHx ( $n=4$ ). (D) Whole liver lysates from indicated mice 2 days post-PHx were immunoblotted and probed with antibodies against pYAP (Y357), YAP, pSFKs (Y416), YES, SRC and  $\beta$ -actin. (E) Liver tissue sections of the indicated livers were stained with anti-Ki67 and anti-YAP antibodies; zone 1 is shown. The number of Ki67<sup>+</sup> cells in different zones was analyzed by cell counting ( $n=3$ ). Scale bar: 50  $\mu$ m. Data expressed as mean  $\pm$  SD. \* $P<0.033$ , \*\* $P<0.002$ , \*\*\* $P<0.001$ , Student's  $t$ -test.

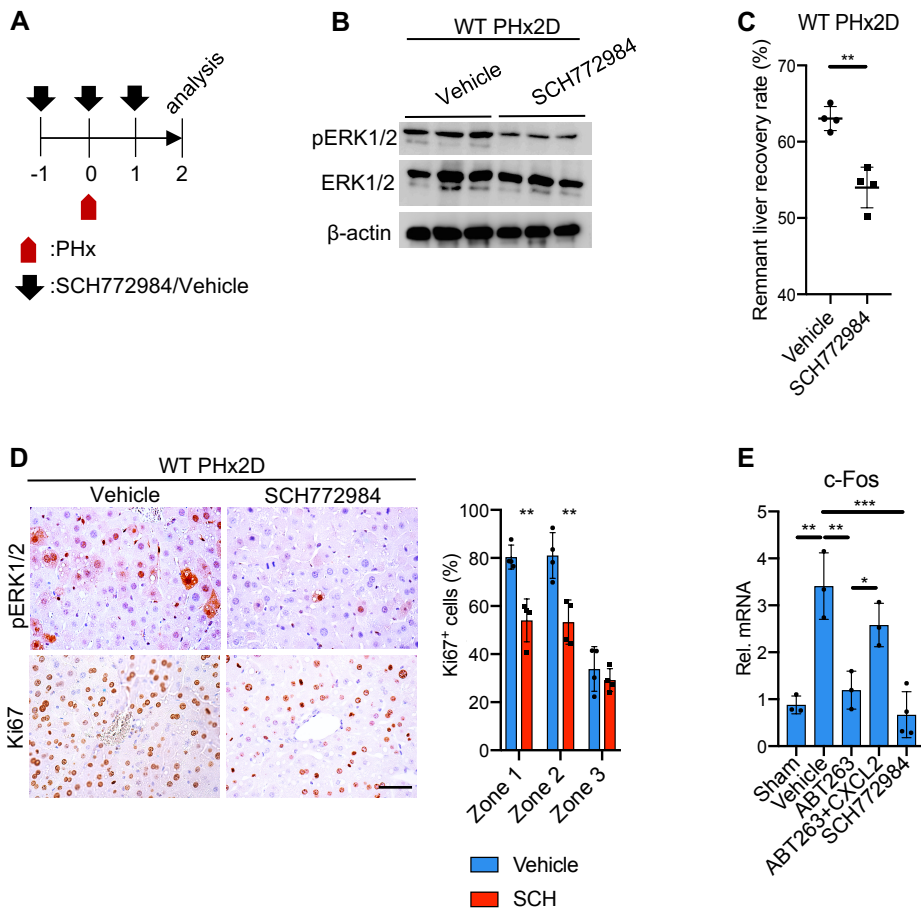

### Supplemental Figure 7. SCH772984 inhibits ERK1/2 activation and impairs liver regeneration.

(A) Experimental scheme of WT male mice subjected to PHx with or without injections of SCH772984 (25 mg/Kg). (B) Whole liver lysates from vehicle-treated and SCH772984-treated WT mice two days post-PHx were immunoblotted and probed with anti-pERK1/2, anti-ERK1/2, and anti- $\beta$ -actin antibodies. (C) The remnant liver recovery rates of WT mice with or without SCH772984 treatment were measured 2 days post-PHx ( $n=4$ ). (D) Liver sections of the above were stained for anti-pERK1/2, and anti-Ki67 antibodies. The Ki67<sup>+</sup> cells in all three zones were quantified by cell counting. (E) The mRNA expression levels of *c-fos* in the indicated livers two days after PHx were detected by qPCR ( $n=4$  for SCH772984,  $n=3$  for the others.) Scale bar: 50  $\mu$ m. Data expressed as mean  $\pm$  SD. \* $P < 0.033$ , \*\* $P < 0.002$ , \*\*\* $P < 0.001$ , Student's *t*-test.

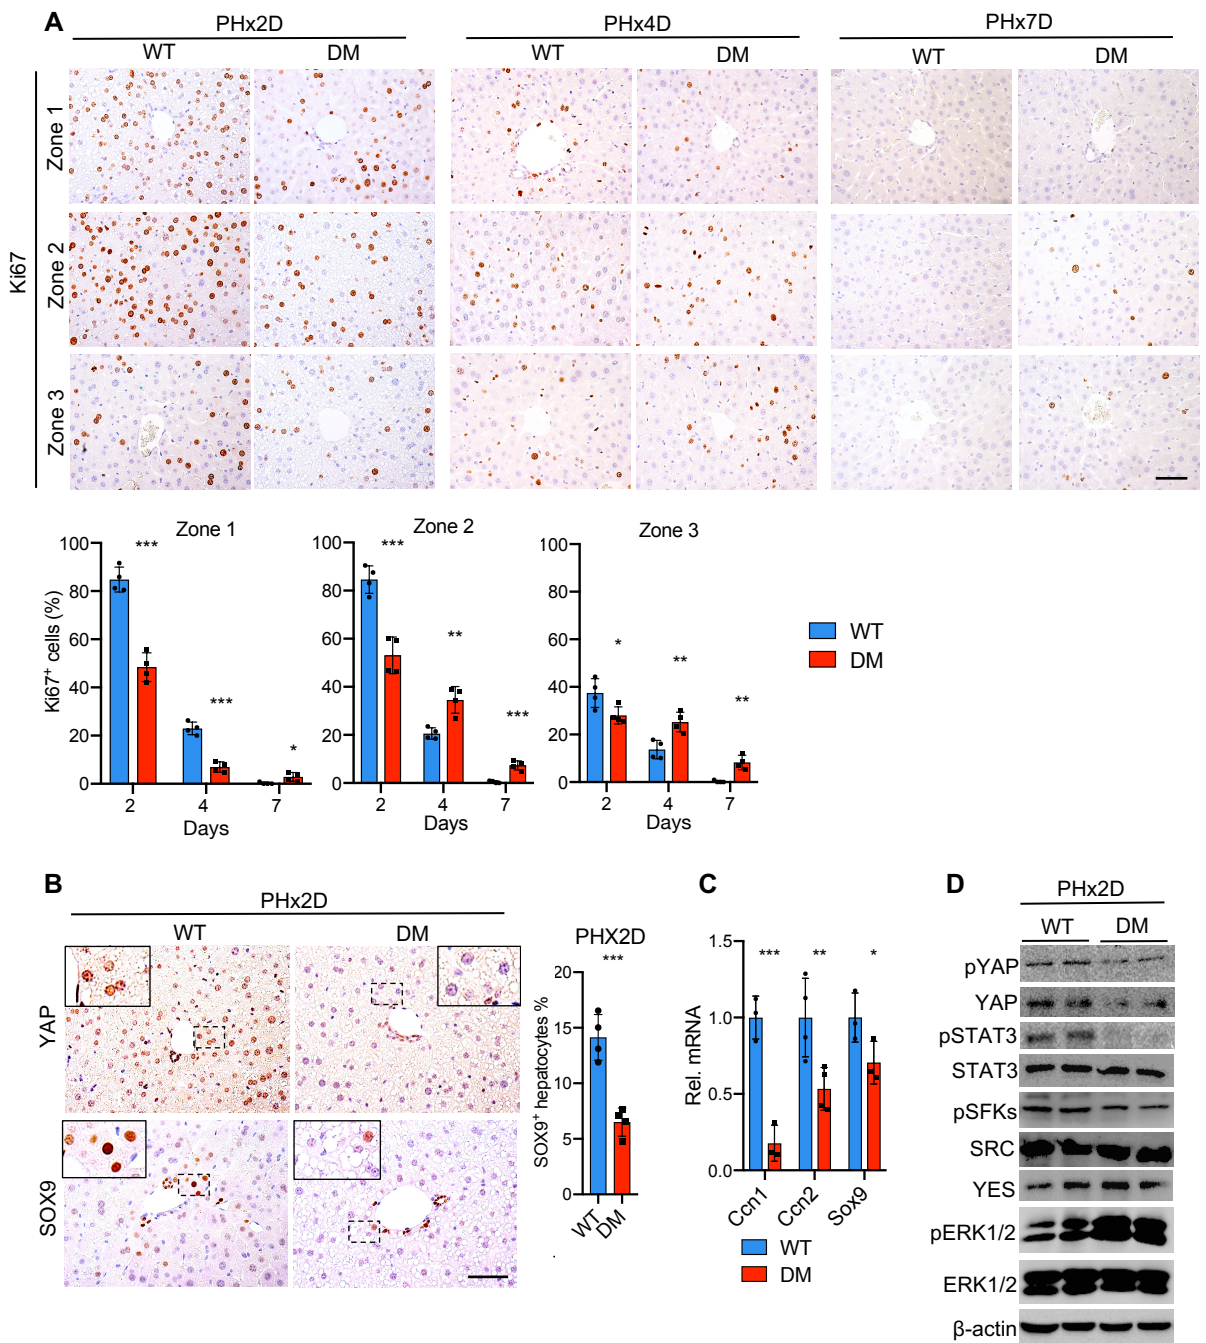

**Supplemental Figure 8. *Ccn1*<sup>DM/DM</sup> mice exhibit impaired regenerative responses.**

(A) Liver sections of WT and *Ccn1*<sup>DM/DM</sup> (DM) mice collected at 2, 4, and 7 days post-PHx were stained with anti-Ki67 antibodies. Ki67<sup>+</sup> cells were quantified by cell counting ( $n=4$ ). (B) Liver sections were also stained with anti-YAP and anti-SOX9 antibodies; zone 1 is shown. The number of SOX9<sup>+</sup> hepatocytes was quantified by cell counting ( $n=4$ ). (C) The expression levels of *Ccn1*, *Ccn2*, and *Sox9* in WT and DM livers two days post-PHx were assessed by qRT-PCR ( $n=3$ ). (D) Whole liver lysates of these livers were probed with antibodies against pYAP (Y357), YAP, pSTAT3 (Y705), STAT3, pSFKs (Y416), SRC, YES, pERK1/2 (T202/Y204), ERK1/2 and  $\beta$ -actin. Scale bar: 50  $\mu$ m. Data expressed as mean  $\pm$  SD. \* $P<0.033$ , \*\* $P<0.002$ , \*\*\* $P<0.001$ , Student's  $t$ -test.

| Gene           | Target sequence (5' to 3') |
|----------------|----------------------------|
| <i>Cxcr2-1</i> | CAGUGGAGAUCUUGAUUU         |
| <i>Cxcr2-2</i> | UAAAGUAAAUGGAUGGACU        |
| <i>Cxcr2-3</i> | CGAAAUCCUGUUAAGGUAA        |
| <i>Cxcr2-4</i> | AAUUCAAGGUGGAUAAGUU        |
| <i>IL-6-1</i>  | CCAAUGCUCUCCUACAGA         |
| <i>IL-6-2</i>  | GGAUACCACUCCCAACAGA        |
| <i>IL-6-3</i>  | CUACCAAACUGGAUUAUU         |
| <i>IL-6-4</i>  | GAUCUACUCGGCAAACCUA        |

**Supplemental Table 1. siRNA sequences used in this study**



| Gene name                      | Forward primer (5' to 3')   | Reverse primer (5' to 3') |
|--------------------------------|-----------------------------|---------------------------|
| <i>p16</i>                     | AATCTCCGCGAGGAAAGC          | GTCTGCAGCGGACTCCAT        |
| <i>p21</i>                     | CAGATCCACAGCGATATCCAG       | AGAGACAACGGCACACTTTG      |
| <i>Mmp2</i>                    | TAACTGGATGCCGTCGT           | TTCAGGTAATAAGCACCCCTTGAA  |
| <i>Mmp3</i>                    | CAAAACATATTTCTTTGTAGAGGACAA | TTCAGCTATTTGCTTGGGAAA     |
| <i>Mmp12</i>                   | TGAATTTGCATTTCTGTACATAGT    | TGCTGTAAGTCCATGGGTGA      |
| <i>Cxcl1</i>                   | AACCGAAGTCATAGCCACAC        | CAGACGGTGCCATCAGAG        |
| <i>Cxcl2</i>                   | GAAGTCATAGCCACTCTCAAGG      | CTTCCGTTGAGGGACAGC        |
| <i>Cxcl5</i>                   | GTTCCATCTCGCCATTCATG        | TTAAGCAAACACAACGCAGC      |
| <i>Pai-1</i>                   | AGGATCGAGGTAACGAGAGC        | TTGGTTGAGGGAATCATTAT      |
| <i>Ccl2</i>                    | CATCCACGTGTTGGCTCA          | GATCATCTTGCTGGTGAATGAGT   |
| <i>Ccl5</i>                    | TGCAGAGGACTCTGAGACAGC       | GAGTGGTGTCCGAGCCATA       |
| <i>IL1-<math>\alpha</math></i> | TCCATAACCCATGATCTGGAA       | TTGGTTGAGGGAATCATTAT      |
| <i>IL-6</i>                    | ACCACTCCCAACAGACC           | TCCAGAAGACCAGAGGAA        |
| <i>Ccn1</i>                    | AAAGGCAGCTCACTGAAG          | GCCGGTATTTCTTGACAC        |
| <i>Ccn2</i>                    | TAGGCCCTCAGCCTCACT          | CTTGACAGGCTTGGGGAT        |
| <i>Sox9</i>                    | GCTTTTCGAATACTGCAAACCTCC    | CGCAAGTGTGTGTGTCTAGACT    |
| <i>Yap1</i>                    | ACCAATAGTTCCGATCCCTTTC      | TGTCTCCTGTATCCATTTTCATCC  |
| <i>c-fos</i>                   | CAGCCTTTCTACTACCATTCC       | GGATAAAGTTGGCACTAGAGACG   |
| <i>Cxcr2</i>                   | GCTCACAAACAGCGTCGTAGAA      | GAGTGGCATGGGACAGCATC      |
| <i>Cyclophilin E</i>           | TTCACAAACCACAATGGCACAGGG    | TGCCGTCCAGCCAATCTGTCTTAT  |

**Supplemental Table 2. Primer sequences used in this study**
